# Supplementary material for: Enhanced catalytic activity of MnCo-MOF-74 for highly selective aerobic oxidation of substituted toluene
Source: Royal Society of Chemistry journal article supplement (doi:10.1039/c8qi00429c), 2018-01-01
Supplement: c8qi00429c1.pdf [file c8qi00429c1.pdf]

## Supplementary Information

### **Enhanced catalytic activity of MnCo-MOF-74 for highly selective aerobic oxidation of substituted toluene**

*Cheng Huang, Rui Liu\*, Wenyu Yang, Yunpeng Li, Jinsong Huang and Hongjun Zhu\**

*Department of Applied Chemistry, College of Chemistry and Molecular Engineering,*

*Nanjing Tech University, Nanjing 211816, China*

*\*Corresponding author. Phone: +86-25-58139539. Fax: +86-25-58139539. E-mail:*

*rui.liu@njtech.edu.cn (R. Liu)*

*\*Corresponding author. Phone: +86-25-83172358. Fax: +86-25-83587428. E-mail:*

*zhuhj@njtech.edu.cn (H. Zhu)*

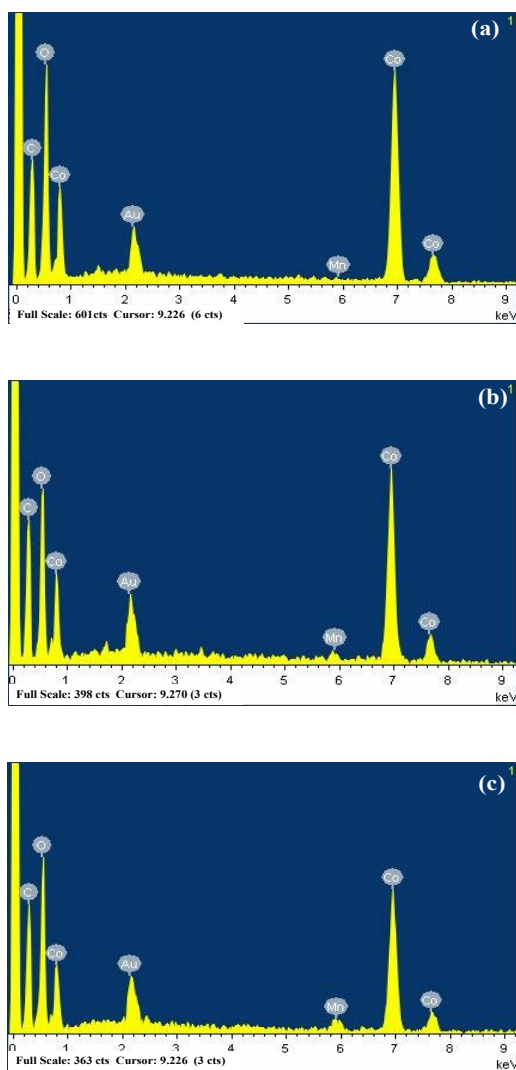

**Fig. S1** EDS spectra of (a) MnCo-MOF-74-3, (b) MnCo-MOF-74-6, and (c) MnCo-MOF-74-9.

**Table S1** Oxidation of toluene catalyzed over M-MOF-74 under different conditions<sup>a</sup>

| Entry | Catalyst         | Time/<br>h | Conversion/% | Selectivity <sup>b</sup> /% |      |     |
|-------|------------------|------------|--------------|-----------------------------|------|-----|
|       |                  |            |              | BAC                         | BA   | BAL |
| 1     | Co-MOF-74        | 18         | 27.3         | 26.6                        | 48.1 | 8.5 |
| 2     | MnCo-MOF-74(dir) | 6          | 12.5         | -                           | 95.4 | 1.4 |
| 3     | MnCo-MOF-74-6    | 24         | 33.1         | 35.2                        | 47.4 | 0.3 |

<sup>a</sup>Reaction condition: 30 mg of catalyst, 3 mL toluene (28 mmol), O<sub>2</sub> balloon, 10 mol% TBHP, 80 °C.

<sup>b</sup> BAC = selectivity of benzoic acid, BA = selectivity of benzaldehyde, BAL = selectivity of benzyl alcohol.

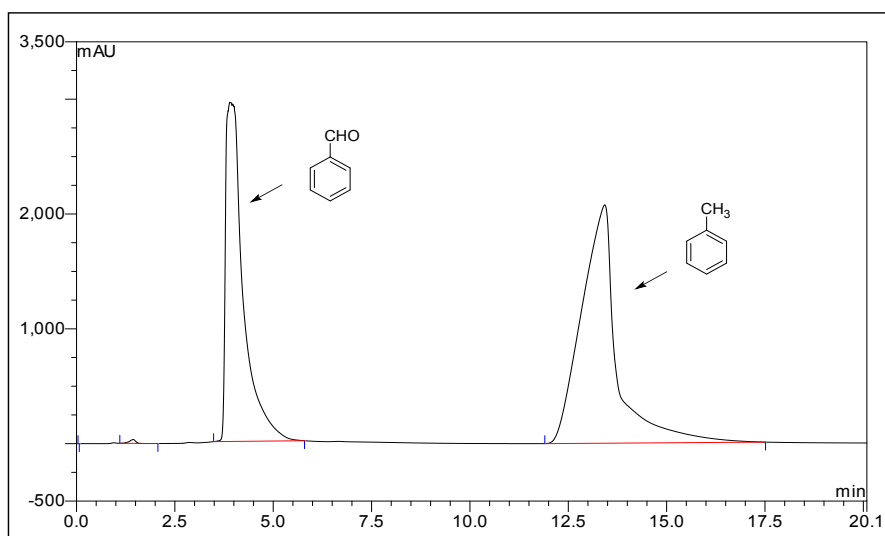

**Fig. S2** HPLC spectrum of the results obtained for the toluene oxidation reaction by MnCo-MOF-74-6, reaction conditions: 30 mg of catalyst, 3.0 mL toluene (28 mmol), O<sub>2</sub> balloon, 10 mol% TBHP, 3 mL MeCN, 80 °C, 6 h.

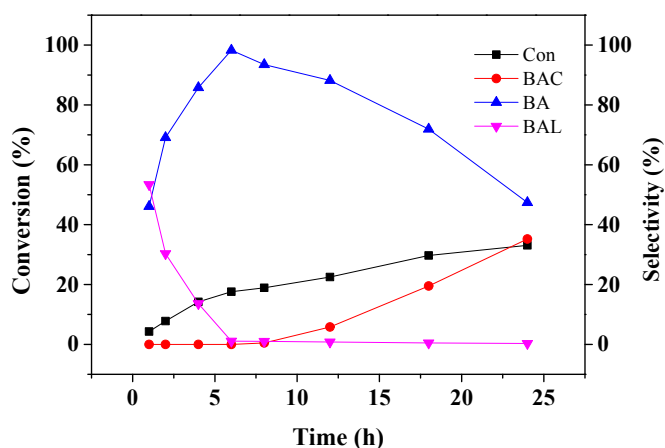

**Fig. S3** Time-dependence plots of aerobic oxidation of toluene over MnCo-MOF-74-6. Reaction conditions: 30 mg of catalyst, 3.0 mL toluene (28 mmol), O<sub>2</sub> balloon, 10 mol% TBHP, 3 mL MeCN, 80 °C.

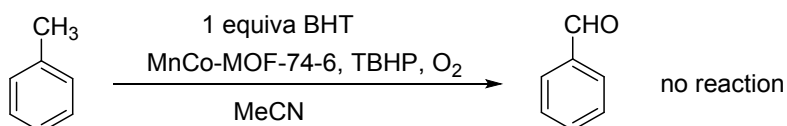

**Scheme S1** Investigation into the reaction mechanism, reaction conditions: 15 mg of catalyst, 1.5 mL toluene (14 mmol), 3.1 g BHT (14 mmol), O<sub>2</sub> balloon, 10 mol% TBHP, 3 mL MeCN, 80 °C, 6 h.

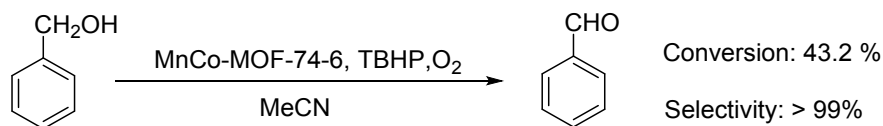

**Scheme S2** Aerobic oxidation of benzaldehyde over MnCo-MOF-74-6, reaction conditions: 30 mg of catalyst, 2.9 mL benzyl alcohol (28 mmol), O<sub>2</sub> balloon, 10 mol% TBHP, 3 mL MeCN, 80 °C, 6 h.

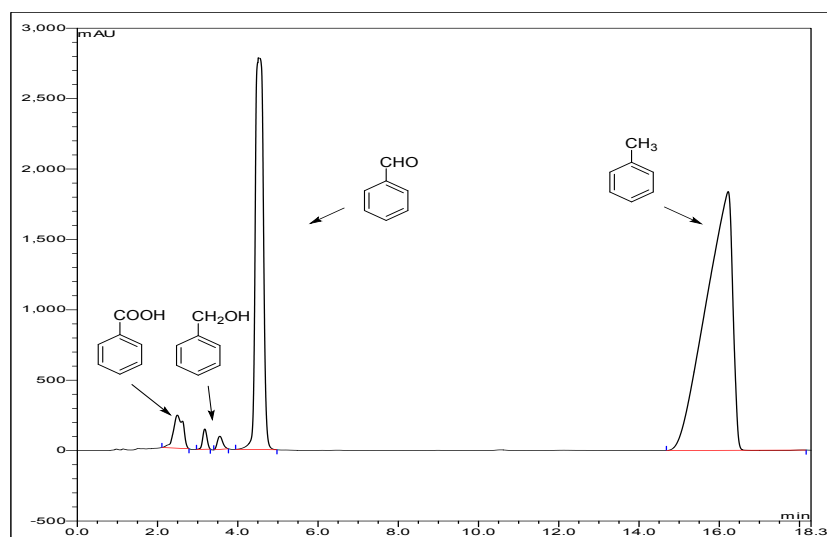

**Fig. S4** HPLC spectrum of the results obtained for the toluene oxidation reaction by MnCo-MOF-74-6, reaction conditions: 30 mg of catalyst, 3.0 mL toluene (28 mmol), O<sub>2</sub> balloon, 10 mol% TBHP, 3 mL MeCN, 80 °C, 18 h.

**Table S2** Summary of Co and Mn species leached in the solution after reaction

| Entry | Catalyst      | Co/mg·L <sup>-1</sup> | Mn/mg·L <sup>-1</sup> |
|-------|---------------|-----------------------|-----------------------|
| 1     | Co-MOF-74     | 1.2                   | -                     |
| 2     | MnCo-MOF-74-6 | 0.9                   | 0.2                   |

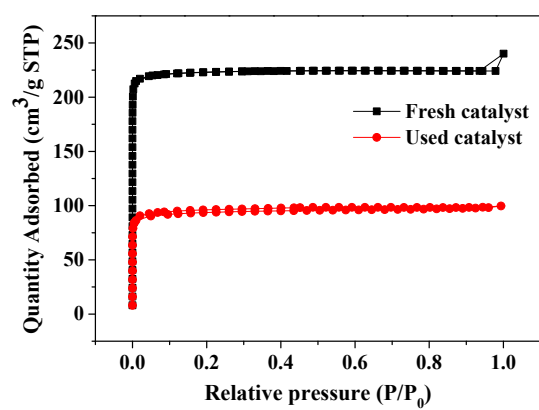

**Fig. S5** Nitrogen adsorption-desorption isotherms of the fresh and used MnCo-MOF-74-6 catalyst in toluene oxidation.
